# Supplementary material
Source: MDPI journal article supplement (https://www.mdpi.com/2072-666X/6/12/1463)
Supplement: s1 [file s1]

## Supplementary Materials

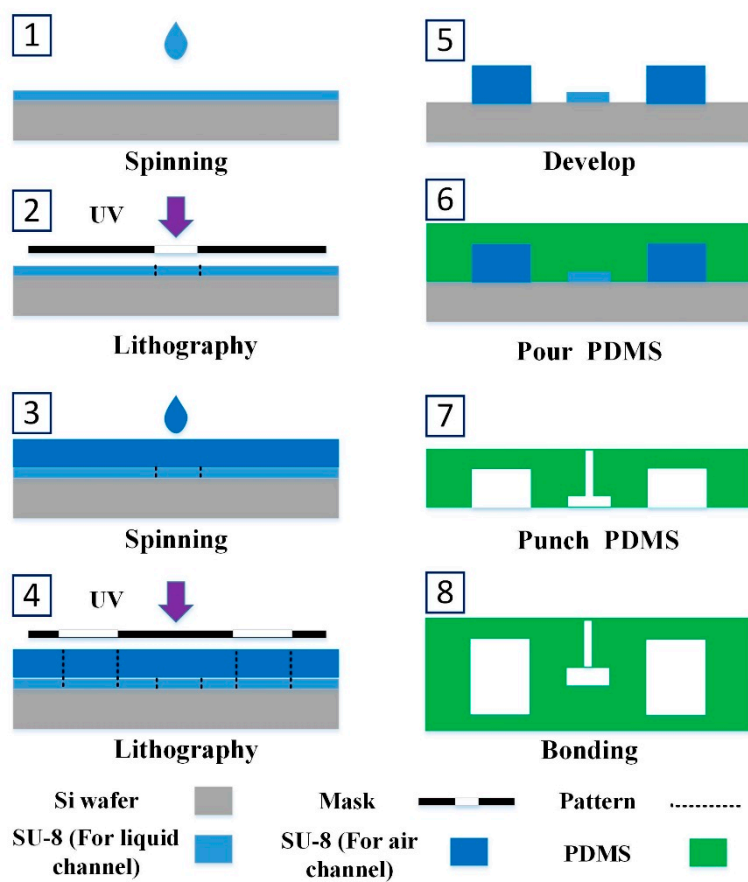

**Figure S1.** Fabrication process of the 3D ESFFI microfluidic chip.

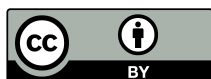

© 2015 by the authors; licensee MDPI, Basel, Switzerland. This article is an open access article distributed under the terms and conditions of the Creative Commons by Attribution (CC-BY) license (<http://creativecommons.org/licenses/by/4.0/>).
